# Supplementary material for: The HAPPY (Healthy and Active Parenting Programmme for early Years) feasibility randomised control trial: acceptability and feasibility of an intervention to reduce infant obesity
Source: Springer Nature journal article supplement (doi:10.1186/s12889-016-2861-z), 2016-03-01
Supplement: MOESM1 [file 9751548]

### Additional File 1: Logic model and summary of intervention content

Full details of theoretical basis and intervention development process can be found in Taylor *et al.*,[1]. The intervention comprises 6 ante-natal and 6 post-natal sessions from ~26 weeks gestation until baby is 9 months old. The intervention is delivered in group session format by trained parenting facilitators, with contact by telephone, text and email in between sessions. Figure 1 presents a logic model, and Table 1 presents a summary of intervention content by session, summarising the detailed information presented within Taylor *et al.*[1]

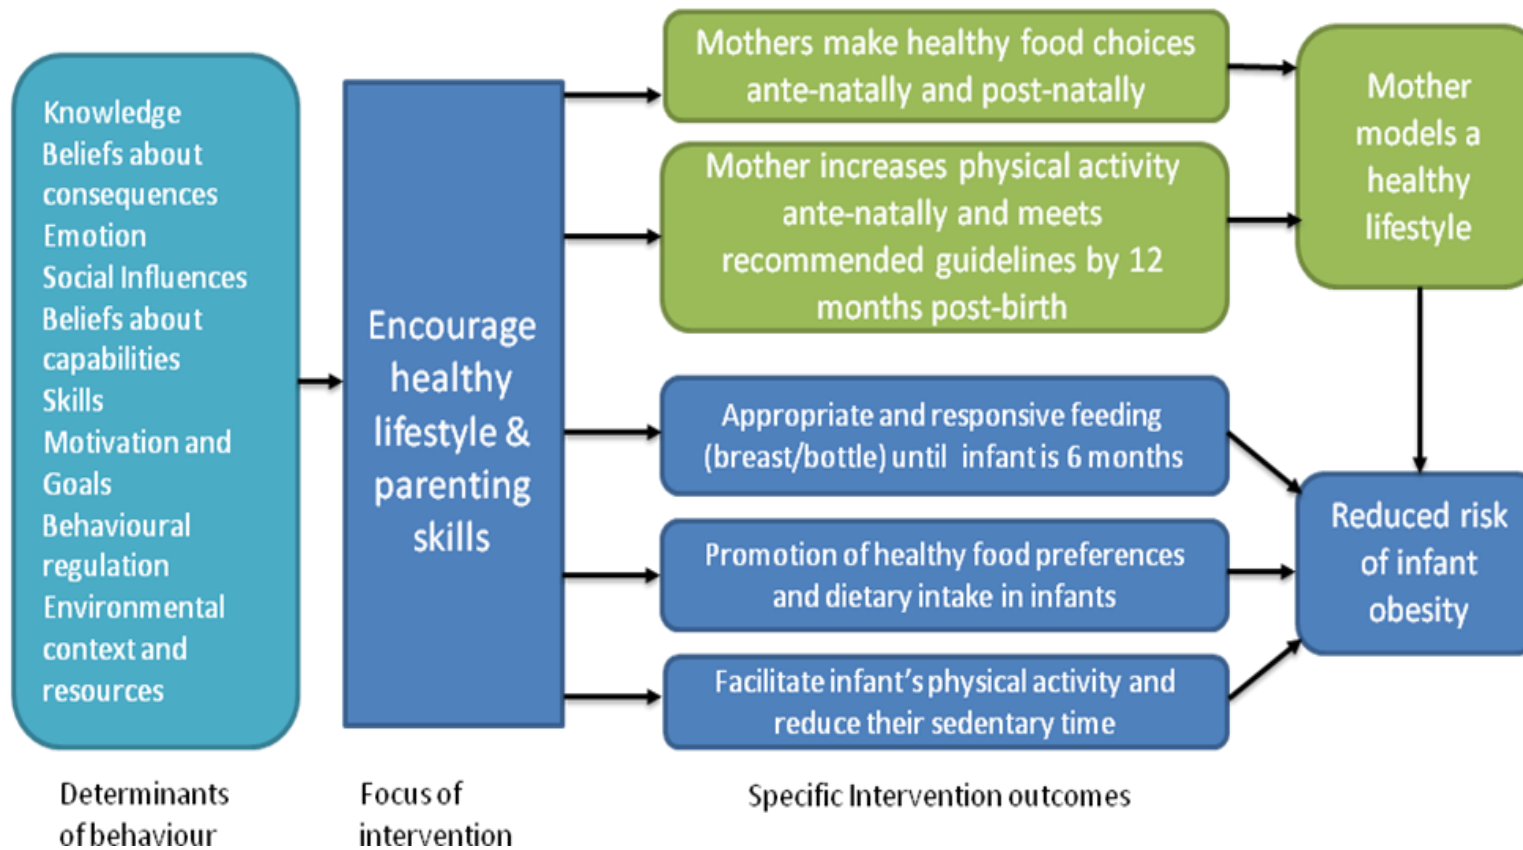

Figure 1 Summary logic model for the HAPPY intervention.

Table 1. Summary of Content

| Timing     | Session (2.5hrs)                                               | Session content targeting specific risk factors                                                                                                                                                                                                                                                                                                                                                                                                                                                                                                                                                                                                                                                                                                                                                                                                                                                                                                                                         |
|------------|----------------------------------------------------------------|-----------------------------------------------------------------------------------------------------------------------------------------------------------------------------------------------------------------------------------------------------------------------------------------------------------------------------------------------------------------------------------------------------------------------------------------------------------------------------------------------------------------------------------------------------------------------------------------------------------------------------------------------------------------------------------------------------------------------------------------------------------------------------------------------------------------------------------------------------------------------------------------------------------------------------------------------------------------------------------------|
| Ante natal | 1. Brain, science and bonding                                  | <b>Parent diet:</b> Healthy diet in pregnancy; links between what you eat when pregnant, you and your baby; link between maternal and childhood obesity; reflect on own diet and importance of food in the family; <b>Parent physical activity:</b> How the baby is developing in the womb and how physical activity can facilitate this; <b>Breastfeeding:</b> Identifying and overcoming barriers to breastfeeding                                                                                                                                                                                                                                                                                                                                                                                                                                                                                                                                                                    |
|            | 2. A celebration of birth                                      | <b>Parent diet:</b> Importance of eating well for the baby; Dispel myths about weight gain in pregnancy and provide up to date information; Smart Snacks hand-out; food diaries; <b>Parent physical activity:</b> Being active during pregnancy; Discussion regarding myths about physical activity in pregnancy                                                                                                                                                                                                                                                                                                                                                                                                                                                                                                                                                                                                                                                                        |
|            | 3. Personal power, self-esteem, and healthy choices about food | <b>Parent diet:</b> Address barriers to healthy eating and plan for ways to overcome them; sign post to cooking information points; healthy foods can be convenient and inexpensive; impact of mother eating unhealthy foods; plan alternative cooking methods; <b>Parent physical activity:</b> List activities women think they could do, work through easy to difficult; gentle strengthening and conditioning exercises: demonstration by practitioners; worries about physical activity; visualize and positive self-talk; identify when activity can be freely integrated into normal life; <b>Breastfeeding:</b> Advantages/ disadvantages of breast and bottle feeding; more you feed, more milk produced; encourage identifying influential family member, clarify likes and dislikes and to talk with the family about these issues to enlist their support; learn more about breastfeeding skills; overcome stigma about breastfeeding in public, stories from other mothers |
|            | 4. Boundaries, beliefs and values                              | <b>Parent diet:</b> Additional information about snacks, food treats, swaps; <b>Parent physical activity:</b> Back-up plan for physical activity at different times; <b>Breastfeeding:</b> Values and beliefs about bringing up children and linking this to breastfeeding                                                                                                                                                                                                                                                                                                                                                                                                                                                                                                                                                                                                                                                                                                              |
|            | 5. Feelings and how we communicate                             | <b>Parent diet:</b> Food swaps and healthy meals feedback; identify vulnerable points in time and have contingencies for when want unhealthy foods; <b>Parent physical activity:</b> Partners review their progress for the collaborative plans made for pa in AN Session 4; discussion about their feelings relating to whether they fulfilled their activity plans                                                                                                                                                                                                                                                                                                                                                                                                                                                                                                                                                                                                                    |
|            | 6. Beyond labour day                                           | <b>Parent diet:</b> Identify someone at home/friend to discuss food habits with; <b>Parent physical activity:</b> Pelvic floor exercises for immediately after pregnancy if uncomplicated; what activities are okay for after pregnancy; <b>Breastfeeding:</b> How to make up bottle correctly; signpost to health professionals; environmental changes: clothes that facilitate feeding; locations nearby; family members can do other things with baby (than formula feed): e.g. bottle feed using expressed milk; <b>Infant diet:</b> Planning ahead                                                                                                                                                                                                                                                                                                                                                                                                                                 |
| Post natal | 7. A celebration of birth (4wk)                                | <b>Parent diet:</b> Information about what a healthy diet should consist of; food diaries; reflect on own diet and importance of food in the family; <b>Parent physical activity:</b> What activities are okay for after pregnancy; gradually introduce more strenuous activity; leaflet with activity examples; physical activity for new mums quiz sheet; practitioner dispels myths; <b>Breastfeeding:</b> Reinforce more you feed, more milk produced; identifying someone to obtain support from; responsive feeding; <b>Infant physical activity:</b> Guidelines for baby activity; myths about physical activity for babies and infants; practitioner dispels myths; weekly age appropriate activities; encourage structured and unstructured play                                                                                                                                                                                                                               |

| Timing | Session (2.5hrs)                          | Session content targeting specific risk factors                                                                                                                                                                                                                                                                                                                                                                                                                                                                                                                                                                                                                                                                                                                                                                                                                                                                                                                                                                                             |
|--------|-------------------------------------------|---------------------------------------------------------------------------------------------------------------------------------------------------------------------------------------------------------------------------------------------------------------------------------------------------------------------------------------------------------------------------------------------------------------------------------------------------------------------------------------------------------------------------------------------------------------------------------------------------------------------------------------------------------------------------------------------------------------------------------------------------------------------------------------------------------------------------------------------------------------------------------------------------------------------------------------------------------------------------------------------------------------------------------------------|
|        | 8. Bringing structure to your life (2mth) | <b>Parent diet:</b> Healthy eating for parents vs children; reflect on own eating patterns and provide ideas; balancing diet and avoiding takeaways; <b>Parent physical activity:</b> Likes/dislikes about physical activity; activities for after pregnancy; identify barriers; integrating activity into normal life; small changes to family environment; structured activities in the house; the local area; self-talk and visualization; choose a physical activity to learn or can already do; <b>Breastfeeding:</b> Identifying barriers; concerns about feeding baby; how to deal with life whilst trying to feed; encourage asking for help to enable breastfeeding to continue and other things to get done; <b>Infant diet:</b> Introducing solids: why and when; follow signs of readiness of weaning; <b>Infant physical activity:</b> Structured play activities for in the house without expensive toys; introducing games; recognising when baby wants to play; flexible with play-time; making baby-active time a priority |
|        | 9. Feeding and feelings (3mth)            | <b>Parent physical activity:</b> Identifying and addressing barriers; coping planning; the 'Pram Pedometer Challenge'; <b>Infant diet:</b> What food and drinks to give; weaning: how to do it - texture and variety, developmental stages, equipment; repeated exposure and coping with food refusal; consequences of an unhealthy diet; facial expressions and tongue thrusting; <b>Infant physical activity:</b> Importance of other family members engaging the baby in activity; weekly age appropriate activities for baby and mum; making home modifications to improve child physical activity and/or eating                                                                                                                                                                                                                                                                                                                                                                                                                        |
|        | 10. Families and food (5mth)              | <b>Parent diet:</b> Feeding a family – what does it take; meal planning; shopping lists; healthy foods can be convenient and inexpensive; reading food labels; impact of mother eating unhealthy foods; <b>Parent physical activity:</b> Review of group progress and setting goals for forthcoming weeks; <b>Infant diet:</b> Eating together; modelling behaviour and feeding role of family and parents; time issues with food planning and preparation; <b>Infant physical activity:</b> Discussion of TV watching; entertaining baby/keeping them safe when doing chores; doing activity as a family; weekly age appropriate activities for baby and mum are demonstrated and practiced; how to baby proof your house for safe physical activity                                                                                                                                                                                                                                                                                       |
|        | 11. Making the most of your day (7mth)    | <b>Parent physical activity:</b> Review of group progress and setting goals for forthcoming weeks; <b>Infant diet:</b> Weaning: how's it going? Introducing lumps; <b>Infant physical activity:</b> Visualisation and self-talk to build confidence; discussion of barriers and how to overcome them; planning for meal preparation, infant napping, and active play; when can activity can be integrated into normal life; environmental changes; weekly age appropriate activities for baby and mum are demonstrated and practiced; revisit discuss sedentary behaviour and use of TV                                                                                                                                                                                                                                                                                                                                                                                                                                                     |
|        | 12. Continuing the HAPPY journey (9mth)   | <b>Parent physical activity:</b> Review of physical activity achievements; reflect on experiences; plan for physical activity future; include follow up monitoring plan by practitioners; announce group winners; <b>Infant diet:</b> Keeping motivated to feed family well; <b>Infant physical activity:</b> Structured play activities in the house ; involving family and friends with infant play; what local area has to offer; baby-proof your house in a physical activity-friendly way; weekly age appropriate activities; planning for after the parenting programme; joining mum and baby activity groups; signposting and goal setting                                                                                                                                                                                                                                                                                                                                                                                           |

1. Taylor NJ, Sahota P, Sargent J, et al. Using intervention mapping to develop a culturally appropriate intervention to prevent childhood obesity: the HAPPY (Healthy and Active Parenting Programme for Early Years) study. The international journal of behavioral nutrition and physical activity 2013;10:142 doi: 10.1186/1479-5868-10-142[published Online First: Epub Date]].
