# Supplementary material for: The HAPPY (Healthy and Active Parenting Programmme for early Years) feasibility randomised control trial: acceptability and feasibility of an intervention to reduce infant obesity
Source: Springer Nature journal article supplement (doi:10.1186/s12889-016-2861-z), 2016-03-01
Supplement: MOESM4 [file 9751548]

**Table 3.1 Logistic regression to predict recruitment into HAPPY trial (N=189 with complete data)**

| Variable                       | Odds Ratio (95% Confidence interval) |
|--------------------------------|--------------------------------------|
| Maternal age at screening      | 0.99 (0.93, 1.06)                    |
| Gestational age at screening   | 0.94 (0.86, 1.02)                    |
| Parity                         | 1.01 (0.81, 1.27)                    |
| Body Mass Index at booking     | 1.00 (0.94, 1.07)                    |
| Ethnicity                      |                                      |
| South Asian origin (reference) | 1                                    |
| White British                  | <b>0.48 (0.22, 0.85)*</b>            |
| Other ethnicity                | 1.21 (0.53, 2.79)                    |

Note: \* p<.05

**Table 3.2 Multivariable regression to predict attendance at intervention sessions (intervention group only, N=53 with complete data)**

| Variable                       | $\beta$ (95% confidence interval) |
|--------------------------------|-----------------------------------|
| Maternal age at screening      | 0.16 (-0.02-0.35)                 |
| Gestational age at screening   | -0.01 (-0.21-0.19)                |
| Parity                         | -0.25 (-0.92 – 0.41)              |
| Body Mass Index at booking     | -0.04 (-0.21-0.124)               |
| Ethnicity                      |                                   |
| South Asian origin (reference) | 1                                 |
| White British                  | 0.36 (-1.41-2.12)                 |
| Other ethnicity                | 0.89 (-1.22 – 2.99)               |

Note: no predictors significant

**Table 3.3 Six-month follow-up data**

| Variable                                                                                          | All N=83          | Intervention N=42 | Control N=41      |
|---------------------------------------------------------------------------------------------------|-------------------|-------------------|-------------------|
| Age of child at time of questionnaire (months)                                                    | 6.2 (0.6)         | 6.3 (0.6)         | 6.1 (0.5)         |
| Child's length available                                                                          | 15 (18.1)         | 7 (16.6%)         | 8 (19.5)          |
| Child's weight available                                                                          | 57 (68.7)         | 31 (73.8)         | 26 (63.4)         |
| <b>Child diet</b>                                                                                 |                   |                   |                   |
| Child ever breastfed                                                                              | 58 (69.9)         | 31 (73.8)         | 27 (65.9)         |
| Child still being breastfed                                                                       | 23 (27.7)         | 14 (33.3)         | 9 (21.9)          |
| Duration of breastfeeding (weeks – of those who reported cessation of breastfeeding) <sup>§</sup> | 4.0 (1.0, 12.9)   | 3.0 (2.0, 8.6)    | 4.7 (0.1, 14.9)   |
| Age given formula (weeks) <sup>§</sup>                                                            | 0.3 (0.1, 4.0)    | 0.4 (0.1, 4.2)    | 0.1 (0.1, 2.0)    |
| Not had formula                                                                                   | 10 (12.1)         | 6 (14.3)          | 4 (9.8)           |
| Age given sweetened drinks (weeks) <sup>§</sup>                                                   | 21.5 (17.2, 21.5) | 21.5 (17.2, 25.8) | 21.5 (17.2, 21.5) |
| Not had sweetened drinks                                                                          | 58 (69.9)         | 28 (66.7)         | 30 (73.2)         |
| Age given solids (weeks) <sup>§</sup>                                                             | 21.5 (17.2, 25.8) | 21.5 (17.2, 25.8) | 21.5 (17.2, 25.8) |
| Not had solids                                                                                    | 6 (7.2)           | 4 (9.5)           | 2 (4.9)           |

| <b>Variable</b>                                         | <b>All<br/>N=83</b> | <b>Intervention<br/>N=42</b> | <b>Control<br/>N=41</b> |
|---------------------------------------------------------|---------------------|------------------------------|-------------------------|
| Age introduced to a feeding cup (weeks)                 | 5.0 (0.9)           | 5.0 (1.0)                    | 5.0 (0.8)               |
| Not used feeding cup                                    | 38 (45.8)           | 17 (40.5)                    | 21 (51.2)               |
| <b>Maternal physical activity</b>                       |                     |                              |                         |
| Hours spent sitting each week day <sup>§</sup>          | 3.5 (2.3, 5.3)      | 3.7 (2.2, 5.6)               | 3.3 (2.3, 5.0)          |
| Missing                                                 | 1 (1.2)             | 1 (2.4)                      | 0                       |
| Hours spent sitting each weekend day <sup>§</sup>       | 3.6 (2.3, 6.0)      | 3.7 (2.3, 6.0)               | 3.5 (2.3, 6.0)          |
| Missing                                                 | 1 (1.2)             | 1 (2.4)                      | 0                       |
| <b>Child physical activity</b>                          |                     |                              |                         |
| Ever spent time on tummy whilst awake                   |                     |                              |                         |
| Yes                                                     | 79 (95.2)           | 40 (95.2)                    | 39 (95.1)               |
| Missing                                                 | 1 (1.2)             | 0                            | 1 (2.4)                 |
| Age started spending time on tummy (weeks) <sup>§</sup> | 17.2 (10.0, 21.5)   | 17.2 (8.6, 21.5)             | 17.2 (12.9, 21.5)       |
| Minutes per day spent on tummy <sup>§</sup>             | 20.0 (5.0, 70.0)    | 30.0 (6.1, 90.0)             | 10.7 (3.6, 60.0)        |
| Minutes per day spent in front of TV <sup>§</sup>       | 17.5 (0.7, 40.0)    | 30.0 (1.1, 60.0)             | 10.4 (0.5, 30.0)        |
| <b>Child development</b>                                |                     |                              |                         |
| Returned ages and stages questionnaire                  |                     |                              |                         |
| Yes                                                     | 32 (38.5)           | 15 (35.7)                    | 17 (41.4)               |
| <b>Health Economic Measures</b>                         |                     |                              |                         |
| <b>Use of Hospital Services</b>                         |                     |                              |                         |
| Had overnight stay in hospital                          |                     |                              |                         |
| Yes                                                     | 18 (21.6)           | 12 (28.6)                    | 6 (14.6)                |
| Missing                                                 | 1 (1.2)             |                              | 1 (2.4)                 |
| Had outpatient appointment                              |                     |                              |                         |
| Yes                                                     | 22 (26.5)           | 13 (31.0)                    | 9 (21.9)                |
| Missing                                                 | 1 (1.2)             |                              | 1 (2.4)                 |
| Had A&E Attendance                                      |                     |                              |                         |
| Yes                                                     | 23 (27.7)           | 14 (33.3)                    | 9 (21.9)                |
| Missing                                                 | 1 (1.2)             |                              | 1 (2.4)                 |
| <b>Use of services outside the hospital</b>             |                     |                              |                         |
| General practitioner (at the surgery)                   |                     |                              |                         |
| Used                                                    | 79 (95.2)           | 41 (97.6)                    | 38 (92.7)               |
| Missing                                                 | 1 (1.2)             | 0                            | 1 (2.4)                 |
| General practitioner (at your home)                     |                     |                              |                         |
| Used                                                    | 1 (1.2)             | 0                            | 1 (2.4)                 |
| Missing                                                 | 1 (1.2)             |                              | 1 (2.4)                 |

| <b>Variable</b>                                                                      | <b>All<br/>N=83</b> | <b>Intervention<br/>N=42</b> | <b>Control<br/>N=41</b> |
|--------------------------------------------------------------------------------------|---------------------|------------------------------|-------------------------|
| Practice nurse (at GP surgery)                                                       |                     |                              |                         |
| Used                                                                                 | 67 (80.7)           | 33 (78.6)                    | 34 (82.9)               |
| Missing                                                                              | 1 (1.2)             | 0                            | 1 (2.4)                 |
| Midwife                                                                              |                     |                              |                         |
| Used                                                                                 | 67 (80.7)           | 33 (78.6)                    | 34 (82.9)               |
| Missing                                                                              | 1 (1.2)             | 0                            | 1 (2.4)                 |
| Midwife support worker                                                               |                     |                              |                         |
| Used                                                                                 | 8 (9.6)             | 6 (14.3)                     | 2 (4.9)                 |
| Missing                                                                              | 1 (1.2)             | 0                            | 1 (2.4)                 |
| Health visitor (home visits)                                                         |                     |                              |                         |
| Used                                                                                 | 79 (95.2)           | 40 (95.2)                    | 39 (95.1)               |
| Missing                                                                              | 1 (1.2)             | 0                            | 1 (2.4)                 |
| Health visitor support worker<br>(home visits)                                       |                     |                              |                         |
| Used                                                                                 | 10 (12.1)           | 34 (81.0)                    | 36 (87.8)               |
| Missing                                                                              | 1 (1.2)             | 0                            | 1 (2.4)                 |
| Physiotherapy                                                                        |                     |                              |                         |
| Used                                                                                 | 4 (4.8)             | 2 (4.8)                      | 2 (4.9)                 |
| Missing                                                                              | 0 (1.2)             | 0                            | 1 (2.4)                 |
| Child health clinics                                                                 |                     |                              |                         |
| Used                                                                                 | 27 (32.5)           | 14 (33.3)                    | 13 (31.7)               |
| Missing                                                                              | 1 (1.2)             | 0                            | 1 (2.4)                 |
| Children's Centre                                                                    |                     |                              |                         |
| Used                                                                                 | 29 (34.9)           | 13 (31.0)                    | 16 (39.0)               |
| Missing                                                                              | 1 (1.2)             | 0                            | 1 (2.4)                 |
| Gym                                                                                  |                     |                              |                         |
| Used                                                                                 | 6 (7.2)             | 2 (4.8)                      | 4 (9.8)                 |
| Missing                                                                              | 1 (1.2)             | 0                            | 1 (2.4)                 |
| Used other services                                                                  |                     |                              |                         |
| Used                                                                                 | 3 (3.6)             | 1 (2.4)                      | 2 (4.9)                 |
| Missing                                                                              | 1 (1.2)             | 0                            | 1 (2.4)                 |
| Have you had any out of pockets<br>health related expenses over the<br>last 6 months |                     |                              |                         |
| Yes                                                                                  | 35 (42.2)           | 21 (50.0)                    | 14 (34.2)               |
| Missing                                                                              | 1 (1.2)             | 0                            | 1 (2.4)                 |

NB Data are mean (SD), n (%) or median (IQR) unless otherwise stated. The latter is denoted with <sup>§</sup>

**Table 3.4 Twelve month follow-up data**

| <b>Variable</b>                                                                       | <b>All<br/>(N=85)</b> | <b>Intervention<br/>(N=39)</b> | <b>Control<br/>(N=46)</b> |
|---------------------------------------------------------------------------------------|-----------------------|--------------------------------|---------------------------|
| Mothers' BMI <sup>§</sup>                                                             | 29.0 (26.0, 32.0)     | 28.0 (26.0, 30.0)              | 29.0 (26.0, 33.0)         |
| Missing                                                                               | 3 (3.5)               | 1 (2.6)                        | 2 (4.3)                   |
| <b>Maternal diet</b>                                                                  |                       |                                |                           |
| Daily fruit and vegetable intake <sup>§</sup>                                         | 4.0 (2.0, 7.0)        | 5.0 (2.0, 9.0)                 | 4.0 (2.0, 7.0)            |
| Foods present in the home                                                             |                       |                                |                           |
| Fruit                                                                                 | 85 (100.0)            | 39 (100.0)                     | 46 (100.0)                |
| Vegetables                                                                            | 85 (100.0)            | 39 (100.0)                     | 46 (100.0)                |
| Snacks                                                                                | 83 (97.7)             | 39 (100.0)                     | 44 (95.7)                 |
| Fizzy drinks (exc. Diet drinks)                                                       | 75 (88.2)             | 36 (92.3)                      | 39 (84.8)                 |
| Quantity of foods present in the home (portions)                                      |                       |                                |                           |
| Fruit <sup>§</sup>                                                                    | 7.0 (5.0, 9.0)        | 7.0 (5.0, 9.0)                 | 7.0 (6.0, 8.0)            |
| Vegetables <sup>§</sup>                                                               | 8.0 (6.0, 9.0)        | 8.0 (6.0, 10.0)                | 8.0 (7.0, 9.0)            |
| Snacks <sup>§</sup>                                                                   | 5.0 (4.0, 6.0)        | 5.0 (3.0, 6.0)                 | 4.0 (4.0, 5.0)            |
| Fizzy drinks (exc. Diet drinks) <sup>§</sup>                                          | 2.0 (1.0, 2.0)        | 2.0 (1.0, 2.0)                 | 2.0 (1.0, 2.0)            |
| Food frequency questionnaire: completed                                               | 80                    | 36                             | 44                        |
| Formula (per day)                                                                     | 0.0 (0.0, 2.0)        | 0.0 (0.0, 2.0)                 | 0.2 (0.0, 2.9)            |
| Commercial savoury baby meals (per week)                                              | 0.0 (0.0, 2.5)        | 0.0 (0.0, 3.0)                 | 0.0 (0.0, 2.0)            |
| Commercial sweet baby meals (per week)                                                | 0.0 (0.0, 0.0)        | 0.0 (0.0, 2.0)                 | 0.0 (0.0, 0.0)            |
| Chips, roast and potato shapes (per week)                                             | 1.0 (0.0, 2.0)        | 1.0 (0.0, 2.0)                 | 1.0 (0.0, 2.0)            |
| Processed meat products (per week)                                                    | 0.3 (0.0, 2.0)        | 0.0 (0.0, 2.0)                 | 0.5 (0.0, 2.5)            |
| Vegetables (per day)                                                                  | 1.6 (1.0, 2.5)        | 1.6 (1.1, 2.7)                 | 1.6 (0.8, 2.4)            |
| Fruit (per day)                                                                       | 1.8 (1.0, 2.9)        | 1.7 (1.0, 2.2)                 | 1.9 (1.0, 3.1)            |
| Sweet snacks (per day)                                                                | 0.6 (0.1, 1.2)        | 0.3 (0.1, 1.3)                 | 0.6 (0.2, 1.1)            |
| Savoury snacks (per week)                                                             | 0.0 (0.0, 2.0)        | 0.0 (0.0, 1.5)                 | 0.0 (0.0, 2.0)            |
| Sugar sweetened drinks (per week)                                                     | 2.0 (0.0, 7.5)        | 1.5 (0.0, 11.0)                | 2.0 (0.0, 7.0)            |
| Pure fruit juice (per week)                                                           | 0.5 (0.0, 7.0)        | 0.3 (0.0, 5.0)                 | 0.7 (0.0, 7.0)            |
| Low sugar drinks (per week)                                                           | 0.0 (0.0, 0.0)        | 0.0 (0.0, 0.0)                 | 0.0 (0.0, 0.0)            |
| Water (per day)                                                                       | 3.0 (2.0, 4.0)        | 3.5 (2.0, 5.0)                 | 3.0 (2.0, 4.0)            |
| <b>Maternal physical activity</b>                                                     |                       |                                |                           |
| Hours spent sitting each week day <sup>§</sup>                                        | 5.4 (3.3, 7.3)        | 6.0 (3.8, 8.0)                 | 4.3 (3.0, 7.0)            |
| Hours spent sitting each weekend day <sup>§</sup>                                     | 5.0 (3.0, 7.8)        | 4.8 (3.0, 8.5)                 | 5.0 (3.0, 7.5)            |
| <b>Accelerometry</b>                                                                  |                       |                                |                           |
| <b>Mothers</b>                                                                        |                       |                                |                           |
| Number accepting an accelerometer                                                     | 78                    | 34                             | 44                        |
| Number who wore belt for at least 7 hours on at least 3 days                          | 28 (35.9)             | 10 (29.4)                      | 18 (40.9)                 |
| Median moderate – vigorous physical activity minutes per day (of those who wore belt) | 13.8 (9.3, 33.0)      | 20.3 (9.6, 38.9)               | 13.6 (9.0, 23.7)          |
| Median sedentary minutes per day (of those who wore belt)                             | 356. (297.5, 404.2)   | 338.3 (258.2, 386.0)           | 370.7 (303.3, 408.7)      |
| <b>Children</b>                                                                       |                       |                                |                           |

| Variable                                                                    | All<br>(N=85)        | Intervention<br>(N=39) | Control<br>(N=46)    |
|-----------------------------------------------------------------------------|----------------------|------------------------|----------------------|
| Number consenting to child wear an accelerometer <sup>1</sup>               | 73                   | 31                     | 41                   |
| Number children who wore belt for at least 5 hours on at least 3 days       | 33 (45.8)            | 10 (32.2)              | 23 (56.1)            |
| Median counts per minute (of those who wore belt)                           | 230.9 (176.2, 385.6) | 183.7 (134.7, 198.8)   | 284.8 (196.9, 406.8) |
| <b>Child diet</b>                                                           |                      |                        |                      |
| Child ever breastfed                                                        | 60 (70.6)            | 28 (71.8)              | 32 (69.6)            |
| Duration of breastfeeding (weeks) <sup>§</sup>                              | 8.6 (4.0, 17.2)      | 7.8 (4.0, 17.2)        | 8.6 (3.0, 17.2)      |
| Age introduced to solid food (weeks)                                        | 24.3 (5.0)           | 24.7 (5.5)             | 24.0 (4.6)           |
| <b>Child development</b>                                                    |                      |                        |                      |
| 'Normal' motor development (ASQ)                                            | 70 (84.0)            | 31 (83.8)              | 39 (84.8)            |
| Missing                                                                     | 2                    | 2                      | 0                    |
| <b>Parenting practices</b>                                                  |                      |                        |                      |
| Low parental self-efficacy (%)                                              | 17 (20.0)            | 10 (25.6)              | 7 (15.2)             |
| Low parental warmth (%)                                                     | 21 (24.7)            | 8 (20.5)               | 13 (28.3)            |
| Hostile parenting (%)                                                       | 17 (20.0)            | 7 (18.0)               | 10 (21.7)            |
| <b>Feeding styles</b>                                                       |                      |                        |                      |
| Concern about the child under eating or becoming underweight <sup>§12</sup> | 1.3 (0.5, 2.3)       | 1.8 (1.0, 2.5)         | 1.0 (0.3, 2.0)       |
| Concern about infant's hunger <sup>§12</sup>                                | 0.3 (0.0, 1.0)       | 0.3 (0.0, 1.0)         | 0.3 (0.0, 1.0)       |
| Awareness of infant's cues <sup>§13</sup>                                   | 3.8 (3.3, 4.0)       | 3.8 (3.0, 4.0)         | 3.8 (3.3, 4.0)       |
| Concern about the infant becoming overweight or overeating <sup>§12</sup>   | 0.0 (0.0, 0.7)       | 0.3 (0.0, 1.0)         | 0.0 (0.0, 0.7)       |
| Feeding the infant on schedule <sup>§14</sup>                               | 2.5 (2.0, 2.5)       | 2.0 (1.5, 2.5)         | 2.5 (2.0, 3.0)       |
| Using food to calm the infant <sup>§14</sup>                                | 1.5 (0.5, 2.0)       | 1.5 (1.0, 2.5)         | 1.0 (0.5, 2.0)       |
| Social interaction during feeding <sup>§14</sup>                            | 2.5 (2.0, 3.0)       | 3.0 (2.0, 3.0)         | 2.5 (2.0, 3.5)       |
| <b>Health Economic Measures</b>                                             |                      |                        |                      |
| <b>Use of Hospital Services</b>                                             |                      |                        |                      |
| Had overnight stay in hospital                                              |                      |                        |                      |
| Yes                                                                         | 7 (8.2)              | 3 (7.7)                | 4 (8.6)              |
| Missing                                                                     | 0                    | 0                      | 0                    |
| Had outpatient appointment                                                  |                      |                        |                      |
| Yes                                                                         | 24 (28.2)            | 10 (25.6)              | 14 (30.4)            |
| Missing                                                                     | 0                    | 0                      | 0                    |
| Had A&E Attendance                                                          |                      |                        |                      |
| Yes                                                                         | 17 (20.0)            | 6 (15.4)               | 11 (23.9)            |
| Missing                                                                     | 0                    | 0                      | 0                    |
| <b>Use of services outside the hospital</b>                                 |                      |                        |                      |
| General practitioner (at the surgery)                                       |                      |                        |                      |
| Used                                                                        | 76 (89.4)            | 35 (89.7)              | 41 (89.1)            |
| Missing                                                                     | 0                    | 0                      | 0                    |

<sup>1</sup> Due to a clerical error, the accelerometry data of one infant could not be linked to their participant ID, thus we were unable to ascertain whether they were part of the intervention or control group

| Variable                                                                      | All<br>(N=85) | Intervention<br>(N=39) | Control<br>(N=46) |
|-------------------------------------------------------------------------------|---------------|------------------------|-------------------|
| General practitioner (at your home)                                           |               |                        |                   |
| Used                                                                          | 1 (2.6)       | 1 (2.6)                | 0                 |
| Missing                                                                       | 0             | 0                      | 0                 |
| Practice nurse (at GP surgery)                                                |               |                        |                   |
| Used                                                                          | 55 (64.7)     | 22 (56.4)              | 33 (71.7)         |
| Missing                                                                       | 0             | 0                      | 0                 |
| Midwife                                                                       |               |                        |                   |
| Used                                                                          | 11 (12.9)     | 6 (15.4)               | 5 (10.9)          |
| Missing                                                                       | 0             | 0                      | 0                 |
| Midwife support worker                                                        |               |                        |                   |
| Used                                                                          | 2 (2.4)       | 0                      | 2 (4.4)           |
| Missing                                                                       | 0             | 0                      | 0                 |
| Health visitor (home visits)                                                  |               |                        |                   |
| Used                                                                          | 36 (42.4)     | 17 (43.6)              | 19 (41.3)         |
| Missing                                                                       | 0             | 0                      | 0                 |
| Health visitor support worker (home visits)                                   |               |                        |                   |
| Used                                                                          | 2 (2.6%)      | 2 (5.1)                | 0                 |
| Missing                                                                       | 0             | 0                      | 0                 |
| Physiotherapy                                                                 |               |                        |                   |
| Used                                                                          | 8 (9.4)       | 3 (7.7)                | 5 (10.9)          |
| Missing                                                                       | 0             | 0                      | 0                 |
| Child health clinics                                                          |               |                        |                   |
| Used                                                                          | 18 (21.2)     | 7 (18.0)               | 11 (23.9)         |
| Missing                                                                       | 0             | 0                      | 0                 |
| Children's Centre                                                             |               |                        |                   |
| Used                                                                          | 30 (35.3)     | 10 (25.6)              | 20 (43.5)         |
| Missing                                                                       | 0             | 0                      | 0                 |
| Gym                                                                           |               |                        |                   |
| Used                                                                          | 10 (11.8)     | 5 (12.8)               | 5 (10.9)          |
| Missing                                                                       | 0             | 0                      | 0                 |
| Used other services                                                           |               |                        |                   |
| Used                                                                          | 1 (1.2)       | 1 (2.6)                | 0                 |
| Missing                                                                       | 0             | 0                      | 0                 |
| Have you had any out of pocket health related expenses over the last 6 months |               |                        |                   |
| Yes                                                                           | 18 (21.2)     | 12 (30.8)              | 6 (13.0)          |
| Missing                                                                       | 0             | 0                      | 0                 |
| EQ-5D Measure                                                                 |               |                        |                   |
| Mobility                                                                      |               |                        |                   |
| No problems in walking about                                                  | 75 (88.2)     | 34 (87.2)              | 41 (89.1)         |
| Some problems walking about                                                   | 9 (10.6)      | 4 (10.3)               | 5 (10.9)          |
| Confined to bed                                                               | 1 (1.2)       | 1 (2.6)                | 0                 |
| Missing                                                                       | 0             | 0                      | 0                 |
| Self care                                                                     |               |                        |                   |
| No problems with self care                                                    | 82 (96.5)     | 37                     | 45                |
| Some problems with self care                                                  | 3 (3.5)       | 2                      | 1                 |
| Unable to wash or dress my self                                               | 0             | 0                      | 0                 |

| Variable                                                                                                    | All<br>(N=85) | Intervention<br>(N=39) | Control<br>(N=46) |
|-------------------------------------------------------------------------------------------------------------|---------------|------------------------|-------------------|
| Missing                                                                                                     | 0             | 0                      | 0                 |
| Usual activities                                                                                            |               |                        |                   |
| No problems performing usual activities                                                                     | 76 (89.4)     | 33 (84.6)              | 43 (93.5)         |
| Some problems performing using activities                                                                   | 9 (10.6)      | 6 (15.4)               | 3 (6.5)           |
| Unable to perform usual activities                                                                          |               |                        |                   |
| Missing                                                                                                     | 0             | 0                      | 0                 |
|                                                                                                             | 0             | 0                      | 0                 |
| Pain / Discomfort                                                                                           |               |                        |                   |
| No pain or discomfort                                                                                       | 58 (68.2)     | 24 (61.5)              | 34 (73.9)         |
| Moderate pain or discomfort                                                                                 | 27 (31.8)     | 15 (38.5)              | 12 (26.1)         |
| Extreme pain or discomfort                                                                                  | 0             | 0                      | 0                 |
| Missing                                                                                                     | 0             | 0                      | 0                 |
| Anxiety / Depression                                                                                        |               |                        |                   |
| Not anxious or depressed                                                                                    | 78 (91.7)     | 43 (87.1)              | 44 (95.7)         |
| Moderately anxious or depressed                                                                             | 5 (5.9)       | 4 (10.3)               | 1 (2.2)           |
| Extremely anxious or depressed                                                                              | 2 (2.4)       | 1 (2.6)                | 1 (2.2)           |
| Missing                                                                                                     | 0             | 0                      | 0                 |
| How is your health today?<br>(range worst imaginable health state: 0-<br>Best imaginable health state: 100) | 67.5 (18.6)   | 61.4 (17.8)            | 72.6 (17.9)       |

Data are mean (SD), n (%) or median (IQR) unless otherwise stated. The latter is denoted with <sup>§</sup>.<sup>1</sup>  
Maximum score=4; <sup>2</sup> Higher=more concern; <sup>3</sup> Higher=more aware; <sup>4</sup> Higher=more likely
