# Supplementary material for: The HAPPY (Healthy and Active Parenting Programmme for early Years) feasibility randomised control trial: acceptability and feasibility of an intervention to reduce infant obesity
Source: Springer Nature journal article supplement (doi:10.1186/s12889-016-2861-z), 2016-03-01
Supplement: MOESM6 [file 9751548]

**Additional file 6: Summary of resources required to deliver the intervention for antenatal and postnatal sessions**

|           | Per participant                                    |                           | Per group                                                   |        |                |
|-----------|----------------------------------------------------|---------------------------|-------------------------------------------------------------|--------|----------------|
| Antenatal | Plastic folder                                     | £2.00                     | 2 manuals with hand-outs                                    | £10.00 |                |
|           | Memory book (blank notebook)                       | £1.00                     | Ring-binder for manual                                      | £2.00  |                |
|           | Pen                                                | £0.20                     | 3 A0 size (large poster size) display boards for each group | £69.00 |                |
|           | The Parenting Puzzle book                          | £12.00                    | 4 constructs board                                          | £23.00 |                |
|           | Tommy's leaflet: Managing your weight in pregnancy | £0.00                     | The Nurturing Game                                          | £23.00 |                |
|           | Start4Life Off to the Best Start booklet           | £0.00                     | Why Love Matters – Sue Gerhard                              | £11.69 |                |
|           | Session 2: 'What we pay attention to' magnet       | £2.80                     | Baby naming dictionary                                      | £7.00  |                |
|           | Session 3: 'Praise is magic' magnet                | £2.80                     | The Social Baby-Lynne Murray                                | £9.65  |                |
|           | Session 4: Candle & candle holder                  | £2.00                     | The Social Baby DVD - Lynne Murray                          | £19.00 |                |
|           | Session 5: 'Have I nurtured myself?' magnet        | £2.80                     | Table cloth                                                 | £1.25  |                |
|           | Session 6: Gift cards (5 per participant + spares) | £0.03                     | Flowers for each session (optional)                         | £17.94 |                |
|           | Session 6: Gift boxes (1 per participant)          | £0.40                     | Name label badges                                           | £2.50  |                |
|           | Session 6: attendance certificate printed on card  | £0.03                     | Set of felt tips                                            | £1.50  |                |
|           |                                                    |                           | Flip chart easel                                            | £33.67 |                |
|           |                                                    |                           | Flip chart paper                                            | £6.46  |                |
|           |                                                    |                           | Flip chart pens                                             | £1.74  |                |
|           |                                                    |                           | Set of post-it notes                                        | £2.85  |                |
|           |                                                    |                           | Ball or bean bag                                            | £1.50  |                |
|           |                                                    |                           | Mints for participants for each session                     | £6.00  |                |
|           |                                                    |                           | Dice                                                        | £1.80  |                |
|           |                                                    |                           | Water jug and glasses                                       | £18.00 |                |
|           |                                                    |                           | Red, green, orange slips of paper                           | £2.80  |                |
|           |                                                    |                           | Ball of string                                              | £2.99  |                |
|           |                                                    |                           | Set of ping pong balls and marbles of different sizes       | £4.65  |                |
|           |                                                    | <b>Subtotal Antenatal</b> | <b>£26.06</b>                                               |        | <b>£279.99</b> |

|           | Per participant                                       |                     | Per group                                                                                 |                |
|-----------|-------------------------------------------------------|---------------------|-------------------------------------------------------------------------------------------|----------------|
| Postnatal | Plastic folder                                        | £2.00               | 2 manuals with hand-outs                                                                  | £10.00         |
|           | Now I can crawl booklet                               | £1.12               | Ring-binder for manual                                                                    | £2.00          |
|           | Pen                                                   | £0.20               | Photography                                                                               | £50.00         |
|           | Session 3: pedometer                                  | £1.00               | Re-use group resources from antenatal classes except for mints, flowers, flip chart paper | £30.00         |
|           | Session 3: option to give small gift to participants  | £2.00               | Tape                                                                                      | £1.50          |
|           | Session 4: gift for baby such as plastic feeding bowl | £1.00               | Popcorn kernels                                                                           | £1.00          |
|           | Session 5: option to give small gift to participants  | £2.00               | Baby Sam toy                                                                              | £10.00         |
|           |                                                       |                     | Baby mat or towel                                                                         | £5.00          |
|           |                                                       |                     | Card for lollipop shapes                                                                  | £2.60          |
|           |                                                       |                     | Types of boundaries board                                                                 | £23.00         |
|           |                                                       | Baby toys and balls | £10.00                                                                                    |                |
|           | <b><i>Subtotal Postnatal</i></b>                      | <b>£9.32</b>        |                                                                                           | <b>£145.10</b> |
|           | <b>TOTAL PER PARTICIPANT</b>                          | <b>£35.38</b>       | <b>TOTAL PER GROUP</b>                                                                    | <b>£425.09</b> |
